# Supplementary material for: A low band gap co-polymer of dithienogermole and 2,1,3-benzothiadiazole by Suzuki polycondensation and its application in transistor and photovoltaic cells
Source: Royal Society of Chemistry journal article supplement (doi:10.1039/c1jm13628c), 2011-01-01
Supplement: c1jm13628c.pdf [file c1jm13628c.pdf]

# A low band gap co-polymer of dithienogermole and 2,1,3-benzothiadiazole by Suzuki polycondensation and its application in transistor and photovoltaic cells.

## Supporting Information

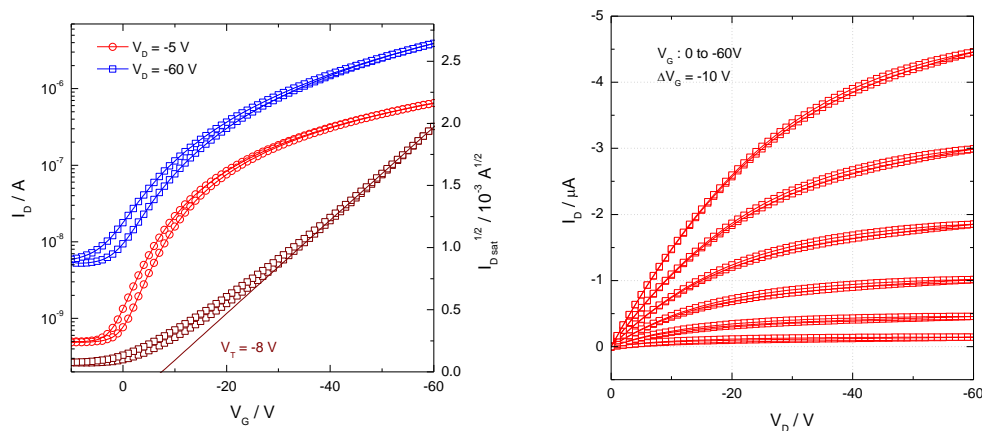

Figure S1. Transfer (left) and output (right) characteristics bottom contact, top gate devices (L = 15  $\mu$ m, W = 10 mm).

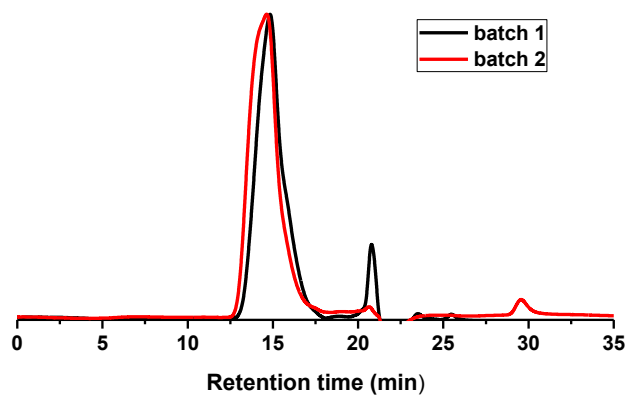

Figure S2. GPC elution traces of two batch of **PGeBTBT** in 80 °C chlorobenzene.
